# Supplementary material for: Effect of regulating gut microbiota using probiotics on functional changes in the brain: protocol for a systematic review
Source: PubMed Central journal article supplement — BMJ Open. 2020 Aug 11;10(8):e037582. doi: 10.1136/bmjopen-2020-037582 (PMC7418664; doi:10.1136/bmjopen-2020-037582), 2020-08-11
Supplement: bmjopen-2020-037582.draft_revisions.pdf [file bmjopen-2020-037582.draft_revisions.pdf]

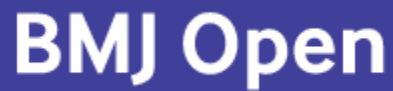

BMJ Open is committed to open peer review. As part of this commitment we make the peer review history of every article we publish publicly available.

When an article is published we post the peer reviewers' comments and the authors' responses online. We also post the versions of the paper that were used during peer review. These are the versions that the peer review comments apply to.

The versions of the paper that follow are the versions that were submitted during the peer review process. They are not the versions of record or the final published versions. They should not be cited or distributed as the published version of this manuscript.

BMJ Open is an open access journal and the full, final, typeset and author-corrected version of record of the manuscript is available on our site with no access controls, subscription charges or pay-per-view fees (<http://bmjopen.bmj.com>).

If you have any questions on BMJ Open's open peer review process please email [info.bmjopen@bmj.com](mailto:info.bmjopen@bmj.com)

# BMJ Open

## Effect of regulating gut microbiota using probiotics on brain activity: protocol for a systematic review

|                               |                                                                                                                                                                                                                                                                                                                                                                                                                                                                                                         |
|-------------------------------|---------------------------------------------------------------------------------------------------------------------------------------------------------------------------------------------------------------------------------------------------------------------------------------------------------------------------------------------------------------------------------------------------------------------------------------------------------------------------------------------------------|
| Journal:                      | <i>BMJ Open</i>                                                                                                                                                                                                                                                                                                                                                                                                                                                                                         |
| Manuscript ID                 | bmjopen-2020-037582                                                                                                                                                                                                                                                                                                                                                                                                                                                                                     |
| Article Type:                 | Protocol                                                                                                                                                                                                                                                                                                                                                                                                                                                                                                |
| Date Submitted by the Author: | 08-Feb-2020                                                                                                                                                                                                                                                                                                                                                                                                                                                                                             |
| Complete List of Authors:     | Liu, Lu; Chengdu University of Traditional Chinese Medicine, Ni, Xixiu<br>Tian, Tian<br>Li, Xiao; Chengdu University of TCM, Acupuncture and Tuina School<br>Li, Fengmei<br>Sun, Mingsheng<br>Chen, Jiao; Chengdu University of Traditional Chinese Medicine<br>Zhou, SiYuan; Chengdu University of Traditional Chinese Medicine, College of Acupuncture and Moxibustion and Tuina,<br>Zhao, Ling; Chengdu University of Traditional Chinese Medicine, College of Acupuncture and Moxibustion and Tuina |
| Keywords:                     | Microbiology < BASIC SCIENCES, Neurobiology < BASIC SCIENCES, Neuropathology < NEUROLOGY, Microbiology < PATHOLOGY, Magnetic resonance imaging < RADIOLOGY & IMAGING, Head & neck imaging < RADIOLOGY & IMAGING                                                                                                                                                                                                                                                                                         |
|                               |                                                                                                                                                                                                                                                                                                                                                                                                                                                                                                         |

SCHOLARONE™  
Manuscripts

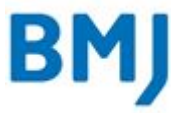

I, the Submitting Author has the right to grant and does grant on behalf of all authors of the Work (as defined in the below author licence), an exclusive licence and/or a non-exclusive licence for contributions from authors who are: i) UK Crown employees; ii) where BMJ has agreed a CC-BY licence shall apply, and/or iii) in accordance with the terms applicable for US Federal Government officers or employees acting as part of their official duties; on a worldwide, perpetual, irrevocable, royalty-free basis to BMJ Publishing Group Ltd ("BMJ") its licensees and where the relevant Journal is co-owned by BMJ to the co-owners of the Journal, to publish the Work in this journal and any other BMJ products and to exploit all rights, as set out in our [licence](#).

The Submitting Author accepts and understands that any supply made under these terms is made by BMJ to the Submitting Author unless you are acting as an employee on behalf of your employer or a postgraduate student of an affiliated institution which is paying any applicable article publishing charge ("APC") for Open Access articles. Where the Submitting Author wishes to make the Work available on an Open Access basis (and intends to pay the relevant APC), the terms of reuse of such Open Access shall be governed by a Creative Commons licence – details of these licences and which [Creative Commons](#) licence will apply to this Work are set out in our licence referred to above.

Other than as permitted in any relevant BMJ Author's Self Archiving Policies, I confirm this Work has not been accepted for publication elsewhere, is not being considered for publication elsewhere and does not duplicate material already published. I confirm all authors consent to publication of this Work and authorise the granting of this licence.

## Title Page

### Title

Effect of regulating gut microbiota using probiotics on brain activity: protocol for a systematic review

### Authors

Lu Liu, MD: Acupuncture and Tuina School, Chengdu University of Traditional Chinese Medicine, Chengdu, Sichuan 610075, China; [liulu@stu.cdutcm.edu.cn](mailto:liulu@stu.cdutcm.edu.cn)

Xixiu Ni, MD: Acupuncture and Tuina School, Chengdu University of Traditional Chinese Medicine, Chengdu, Sichuan 610075, China; [nixixiu@stu.cdutcm.edu.cn](mailto:nixixiu@stu.cdutcm.edu.cn)

Tian Tian, MD: Acupuncture and Tuina School, Chengdu University of Traditional Chinese Medicine, Chengdu, Sichuan 610075, China; [tiantian@stu.cdutcm.edu.cn](mailto:tiantian@stu.cdutcm.edu.cn)

Xiao Li, MD: Acupuncture and Tuina School, Chengdu University of Traditional Chinese Medicine, Chengdu, Sichuan 610075, China; [1039061367@qq.com](mailto:1039061367@qq.com)

Fengmei Li, MD: Acupuncture and Tuina School, Chengdu University of Traditional Chinese Medicine, Chengdu, Sichuan 610075, China; [lifengmei@stu.cdutcm.edu.cn](mailto:lifengmei@stu.cdutcm.edu.cn)

Mingsheng Sun, PhD: Acupuncture and Tuina School, Chengdu University of Traditional Chinese Medicine, Chengdu, Sichuan 610075, China; [sunmingsheng@stu.cdutcm.edu.cn](mailto:sunmingsheng@stu.cdutcm.edu.cn)

Jiao Chen, PhD: Acupuncture and Tuina School, Chengdu University of Traditional Chinese Medicine, Chengdu, Sichuan 610075, China; [chenjiao@cdutcm.edu.cn](mailto:chenjiao@cdutcm.edu.cn)

Siyuan Zhou, PhD: Acupuncture and Tuina School, Chengdu University of

Traditional Chinese Medicine, Chengdu, Sichuan 610075,China;zsy@cdutcm.edu.cn

Ling Zhao, PhD: Acupuncture and Tuina School, Chengdu University of Traditional Chinese Medicine, No.37 Shier Qiao Road, Chengdu, Sichuan 610075, China; Tel:+8602887687008; [zhaoling@cdutcm.edu.cn](mailto:zhaoling@cdutcm.edu.cn); **(the corresponding author)**

**Author’s Contributions**

LL developed the search strategy, TT and XL will search the databases and screen the eligibility of the retrieved studies. FL and XN will extract information from the eligible studies and prepare the information for data analysis. JC, MS and SZ will perform the data analysis. LL and LZ wrote the first draft of the protocol. In practice, LZ will monitor each procedure of the review and is responsible for quality control. All authors read the article and approved it for publication. All authors read and approved the final manuscript and order of authorship.

**Conflict of Interest Disclosures**

None reported.

**Word Count**

2391 words.

**Key Words**

Probiotics, gut microbiota, brain activity, fMRI

For peer review only

1  
2  
3  
4  
5  
6  
7  
8  
9  
10  
11  
12  
13  
14  
15  
16  
17  
18  
19  
20  
21  
22  
23  
24  
25  
26  
27  
28  
29  
30  
31  
32  
33  
34  
35  
36  
37  
38  
39  
40  
41  
42  
43  
44  
45  
46  
47  
48  
49  
50  
51  
52  
53  
54  
55  
56  
57  
58  
59  
60

# Effect of regulating gut microbiota using probiotics on brain activity: protocol for a systematic review

Lu Liu,Xixiu Ni,Tian Tian,Xiao Li,Fengmei Li,Mingsheng Sun,Jiao Chen, Siyuan  
Zhou, Ling Zhao

Acupuncture and Tuina School, Chengdu University of TCM, Chengdu, Sichuan,  
China

**Authors:**

Lu Liu, MD: Acupuncture and Tuina School, Chengdu University of Traditional  
Chinese Medicine, Chengdu, Sichuan 610075, China;liulu@stu.cdutcm.edu.cn

Xixiu Ni, MD: Acupuncture and Tuina School, Chengdu University of Traditional  
Chinese Medicine, Chengdu, Sichuan 610075, China;nixixiu@stu.cdutcm.edu.cn

Tian Tian, MD: Acupuncture and Tuina School, Chengdu University of Traditional  
Chinese Medicine, Chengdu, Sichuan 610075, China;tiantian@stu.cdutcm.edu.cn

Xiao Li, MD: Acupuncture and Tuina School, Chengdu University of Traditional  
Chinese Medicine, Chengdu, Sichuan 610075, China;1039061367@qq.com

Fengmei Li, MD: Acupuncture and Tuina School, Chengdu University of Traditional  
Chinese Medicine, Chengdu, Sichuan 610075, China;lifengmei@stu.cdutcm.edu.cn

Mingsheng Sun, PhD: Acupuncture and Tuina School, Chengdu University of  
Traditional Chinese Medicine, Chengdu, Sichuan 610075, China;sunmingsheng  
@stu.cdutcm.edu.cn

Jiao Chen, PhD: Acupuncture and Tuina School, Chengdu University of Traditional  
Chinese Medicine, Chengdu, Sichuan 610075, China;chenjiao@cdutcm.edu.cn

Siyuan Zhou, PhD: Acupuncture and Tuina School, Chengdu University of  
Traditional Chinese Medicine, Chengdu, Sichuan 610075, China;zsy@cdutcm.  
edu.cn

Ling Zhao, PhD: Acupuncture and Tuina School, Chengdu University of Traditional Chinese Medicine, No.37 Shier Qiao Road, Chengdu, Sichuan 610075, China; Tel:+8602887687008; zhaoling@cdutcm.edu.cn; (the corresponding author)

## Word Count:

2,391 words

## Key Words:

probiotics, gut microbiota, brain activity, fMRI

## Abstract

**Introduction** There is a growing number of randomized controlled trials (RCTs) that focus on brain activity changes detected by fMRI and gut microbiota composition changes after using probiotics. However, the effect of probiotics on brain activity through gut microbiota remains controversial in existing RCTs. Furthermore, to our knowledge, there is no systematic review to evaluate the effect of probiotics on brain activity through gut microbiota. Therefore, we aim to summarize literatures evaluating the potential association between probiotics, gut microbiota and brain activity to elucidate whether probiotics influence gut microbiota and affect brain activity through gut microbiota.

**Methods and analysis** CNKI, Wanfang Data, VIP Databases, SinoMed, PubMed, Web of Science, MEDLINE, EMBASE, the Cochrane Central Register of Controlled Trials, ClinicalTrials.gov and Cochrane Library CENTRAL were searched until July 2019. The Grey Literature in Europe (OpenSIGLE) database and Google search engine were also used. The reference lists of each included study were reviewed to determine whether there were any further relevant studies. RCTs using probiotics alone or with prebiotics (synbiotics) compared with a placebo/control will be included. We will use risk of bias assessment and the GRADE System to assess the quality of evidence. The results of the systematic review will be synthesized narratively in the domains of the three primary outcome measures: the changes in brain function and their association with the changes in clinical symptoms after probiotics' administration; the changes in composition or diversity of gut microbiota and their association with the changes in

clinical symptoms after probiotics’ administration;the relationship between the functional alteration area of the brain and the changes in composition or diversity of gut microbiota after probiotics’ administration.

**Ethics and dissemination** The results will be disseminated through a peer-reviewed publication. As no private and confidential patient data will be included in the reporting, there are no ethical considerations associated with this protocol.

**PROSPERO registration number** CRD42019145114

## Article Summary

### Strengths and limitations of this study

1. This is the first systematic review assessing the potential association between probiotics, gut microbiota and brain activity.
2. The study design adheres to all relevant guidelines for systematic reviews and meta-analysis.
3. The quality of evidence will be assessed by the GRADE system.
4. This systematic review will have inherent limitations related to the included studies such as risk of bias, methodological inconsistencies and incomplete outcome data.
5. We will only retrieve data from Chinese and English databases, which may limit available data or result in language bias.

## Background

Probiotics are defined as “live microorganisms” that provide health benefits to the host when consumed in adequate amounts.<sup>1</sup> The use of probiotics has emerged as a principal approach to maintain the balance of the human gut microbiota.<sup>2</sup>

Probiotics have a strong ability to modulate the gut microbiota composition in healthy subjects,<sup>3-4</sup> leading to a significant reduction in several bacterial genera directly involved in the onset of gastrointestinal diseases.<sup>3</sup> Furthermore, probiotics regulate the gut microbiota of patients with gastrointestinal diseases and improve clinical symptoms.<sup>5-6</sup> These findings show that probiotics can be used to treat gastrointestinal

diseases by maintaining or changing the gut microbiota.

The gut microbiota includes bacteria, fungi, archaea, protozoa and viruses that interact with the host and each other to affect the host's physiology and health.<sup>7</sup> The microbiota has recently emerged as a key player in the gut-brain axis. This interaction between the brain and the microbiota has led to the recognition of a new term called 'microbiota-gut-brain axis'.<sup>8</sup> This interaction is bidirectional, meaning that disturbance in the complex community of microbiota (dysbiosis) can affect the brain and vice versa.<sup>9</sup> In clinical trials, neurological disorders were linked to gastrointestinal dysfunction and changes in gut microbiota.<sup>10</sup> *Candida albicans* exposure has been found to be associated with gastrointestinal dysfunction and impaired cognitive ability.<sup>11</sup> A meta-analysis that was performed on 13 studies up until 2016 has shown that there were significant differences in the levels of *Lactobacillus*, *Bifidobacterium* and *Faecalibacterium prausnitzii* in irritable bowel syndrome (IBS) patients compared with healthy controls.<sup>12</sup> Alteration in gut microbiota may contribute to IBS pathogenesis by altering the gut-brain axis.<sup>13</sup>

The underlying signaling mechanisms of these communicating networks between the gut flora and the gut-brain axis have been of special interest to researchers who are seeking potential therapeutic interventions.<sup>9</sup> The ingestion of probiotics by healthy humans showed diminished psychological symptoms, including anxiety symptoms,<sup>14</sup> while probiotic intervention significantly ameliorated the severity of depression in major depressive disorder patients,<sup>15</sup> and IBS patients.<sup>16</sup> The above results show that probiotics affect central nervous system diseases and this effect may be exerted through the microbiota-gut-brain axis. A study has systematically reviewed the effects of probiotics on central nervous system function in animals and humans suggesting that more research using both behavioral and neuroimaging measures on healthy volunteers and patients is needed in the future.<sup>17</sup> Furthermore, most of the psychological assessments in clinical trials were based solely on self-reported measures, hence firm conclusions regarding the effects of probiotics on the central nervous system cannot be drawn from these findings.

Given the difficulty of studying the brain at the cellular level in humans, neuroimaging has emerged as a tool for increasing our understanding of the microbiota-gut-brain axis. Advances in computational biology are beginning to

explain how these multifaceted and complex systems interact with each other.<sup>18-19</sup> Functional magnetic resonance imaging (fMRI) is able to measure moment-to-moment alterations in the blood oxygen content (the blood oxygen level dependent or BOLD signal).<sup>20</sup> Furthermore, it enables us to identify real-time changes in neurological activity and correlate these with changes in behavior or perception.<sup>17,21-22</sup> fMRI has been used successfully to identify differences in brain function in gastrointestinal disease states, such as IBS and inflammatory bowel disease, as well as in healthy people before and after chronic ingestion of probiotics.<sup>20,23-24</sup> Using fMRI, enables us to examine whether probiotics influence the gut microbiota and affect brain activity through the gut microbiota. It helps us better understand the microbiota-gut-brain axis, to develop a potential therapeutic method for central nervous system diseases in the future.

Recently, there were RCTs that focused on brain activity changes detected by fMRI and gut microbiota composition changes after using probiotic supplements. However, the effect of probiotics on brain activity through gut microbiota remains controversial in existing RCTs.<sup>16,23,25</sup> Furthermore, to our knowledge, there is no systematic review to evaluate the effect of probiotics on brain activity through gut microbiota. Therefore, we plan to systematically analyze all published RCTs in the medical literature to assess the effects of probiotics on the gut microbiota and brain activities. This will improve our understanding of the microbiota-gut-brain axis. Moreover, a deeper understanding of the underlying mechanisms will help refine the clinical use of probiotic supplements in the future.

**Objectives**

The objective of this systematic review is to summarize the literature evaluating the potential association between probiotics, gut microbiota and brain activity. fMRI of the participants after taking probiotics of any type, dosage, time point and duration will be evaluated. To this end, we aim to:

- (1) Evaluate the relationship between the changes in clinical symptoms and the functional alteration area of the brain after probiotics' administration.
- (2) Evaluate the relationship between the changes in clinical symptoms and the changes in composition or diversity of gut microbiota after probiotics' administration.

(3) Evaluate the relationship between the functional alteration area of the brain and the changes in composition or diversity of gut microbiota after probiotics' administration.

We aim to determine whether probiotics influence gut microbiota and affect brain activity through the gut microbiota.

## Methods

### Retrieval strategy

The following databases were searched until July 2019 for relevant RCTs: China National Knowledge Infrastructure (CNKI), Wanfang Data, VIP Databases, SinoMed, PubMed, Web of Science, MEDLINE, EMBASE, the Cochrane Central Register of Controlled Trials, ClinicalTrials.gov and Cochrane Library CENTRAL. The Grey Literature in Europe (OpenSIGLE) database and Google search engine were also searched. Furthermore, reference lists of each included study were reviewed to determine whether there were any further relevant studies. The search terms and search strategy are shown in Table 1:

Table 1. Search terms and search strategy

|                  |                                          |
|------------------|------------------------------------------|
| 1.probiotic      | 16.fermented milk                        |
| 2.culturelle     | 17.fMRI                                  |
| 3.Bifidobacteria | 18.MRI                                   |
| 4.Lactobailli    | 19.MR                                    |
| 5.Acidophilus    | 20.functional magnetic resonance imaging |
| 6.yogurt         | 21.magnetic resonance imaging            |
| 7.gut microbiota | 22.neuroimaging                          |
| 8.yeast          | 23.brain activity                        |
| 9.Saccharomyces  | 24.MR tomography                         |
| 10.prebiotic     | 25.NMR Imaging                           |

|                                             |                                                                                           |
|---------------------------------------------|-------------------------------------------------------------------------------------------|
| 11.Synbiotics                               | 26.脑功能成像                                                                                  |
| 12.Bacillus                                 | 27.核磁共振成像                                                                                 |
| 13.enterococcus                             | 28.功能性磁共振                                                                                 |
| 14.streptococcus                            | 29.益生菌                                                                                    |
| 15.sour milk                                | 30.益生元                                                                                    |
|                                             | 31.肠道菌群                                                                                   |
| 32.“probiotic-related” terms                | 1 OR 2 OR 3 OR 4 OR 5 OR 6 OR 7 OR 8 OR 9<br>OR 10 OR 11 OR 12 OR 13 OR 14 OR 15 OR<br>16 |
| 33.“fMRI-related” terms                     | 17 OR 18 OR 19 OR 20 OR 21 OR 22 OR 23<br>24 OR 25                                        |
| FINAL SEARCH TERMS                          | “32” AND “33”                                                                             |
| FINAL SEARCH TERMS FOR CHINESE<br>DATABASES | “29 OR 30 OR 31” AND “26 OR 27 OR 28”                                                     |

**Inclusion criteria**

- (1) Type of study: clinical randomized controlled trials.
- (2) Participants: healthy individuals or patients.
- (3) Interventions: probiotics alone or together with prebiotics (synbiotics) compared with a placebo/control.
- (4) Outcomes: primary outcomes: brain imaging data obtained from fMRI and their association with clinical symptoms after using probiotics; changes in composition and diversity of the gut microbiota and their association with clinical symptoms after using probiotics; relationship between the functional alteration area of the brain and the changes in composition or diversity of the gut microbiota after probiotics’ administration. Secondary outcomes: adverse events and participants’ compliance during the trial.

**Exclusion criteria**

- (1) Non-clinical randomized controlled trials.
- (2) Editorials, literature reviews, and meta-analyses.
- (3) Duplicate publications.
- (4) Studies without full report of study results or primary data.

### **Outcome measures**

The primary outcome measures for this review will be the assessment of brain activity changes, which were measured by fMRI, as they relate to gut microbiota regulated by probiotics.

Three different primary outcome measures will be obtained from the following primary research:

- (1) The functional alteration area of the brain and its association with the changes in clinical symptoms after probiotics' administration.
- (2) The changes in composition or diversity of the gut microbiota and their association with the changes in clinical symptoms after probiotics' administration.
- (3) The relationship between the functional alteration area of the brain and the changes in composition or diversity of the gut microbiota after probiotics' administration.

Secondary outcome measures: the relevant adverse events and participants' compliance.

### **Study selection**

All the studies retrieved through the search strategy will first be screened based on title and abstract using ENDNOTE, which can remove duplicates. Two reviewers will independently screen all titles and abstracts according to the inclusion criteria. Any disagreements will be resolved by discussion or a third reviewer. Full text of potentially eligible studies based on title and abstract will be screened for eligibility by two reviewers independently; disagreements will be resolved by discussion or a third reviewer if necessary. Reasons for study exclusions will be recorded.

### **Data extraction**

Data will be extracted from each eligible study including the following information: authors; year of publication; journal; sample size; demographic characteristics of sample (age, ethnicity, sex); any information (e.g. type, duration, dose, time point) we can get on the intervention group and control/placebo group; data analysis strategy used; fMRI data analysis strategy used; outcomes (the functional alteration area of the brain and its association with the changes in clinical symptoms after probiotics' administration; gut microbiota composition or diversity changes and their association with the changes in clinical symptoms after probiotics' administration; relationship between the functional alteration area of the brain and the changes in composition or diversity of gut microbiota after probiotics' administration; adverse events and participants' compliance, and conclusions.

**Quality assessment**

Risk of bias assessment: the included studies will be assessed by two independent investigators using the Cochrane Risk of Bias Assessment Tool.<sup>26</sup> The assessment will include contents of random sequence generation, allocation concealment, blinding (of participants, personnel and outcome assessors), incomplete outcome data and selective outcome reporting and other sources of bias. The investigators' judgment will be categorized as "Low risk", "High risk" or "Unclear risk" of bias. The disagreements will be resolved by discussion or a third analyzer if necessary.

Quality of evidence assessment: two independent reviewers will assess overall quality of evidence using the Grading of Recommendations Assessment, Development and Evaluation (GRADE) system, examining the quality of the literature in five domains—risk of bias, publication bias, consistency, directness, and precision.<sup>27</sup> This system has four levels of classification ("high", "moderate", "low" and "very low") to which each study can be assigned based on different factors. Disagreements will be resolved by discussion or a third analyzer if necessary.

**Strategy of data synthesis**

The results of the systematic review will be synthesized narratively in the domains of the three primary outcome measures: the functional alteration area of the brain and its association with the changes in clinical symptoms after probiotics'

administration; the changes in composition or diversity of the gut microbiota and their association with the changes in clinical symptoms after probiotics' administration; relationship between the functional alteration area of the brain and the changes in composition or diversity of the gut microbiota after probiotics' administration, and one secondary outcome measure: the relevant adverse events and participants' compliance. We will extract the functional alteration area of the brain to evaluate whether probiotics are effective in changing particular brain regions, where the altered regions in the brain are, and whether the altered brain regions were different between healthy individuals and patients. Additionally, we will evaluate the relationship between the changes in clinical symptoms and the functional alteration area of the brain after probiotics' administration. If possible from the number of studies available, we will use narrative review to explicate whether a "dose-dependent" or "type-dependent" relationship can be identified between probiotic supplements and brain activity changes. We will also evaluate the relationship between the changes in clinical symptoms and the changes in composition or diversity of the gut microbiota after probiotics' administration, and evaluate the relationship between the functional alteration area of the brain and the changes in composition or diversity of the gut microbiota after probiotics' administration. Finally, we will record all the adverse events and participants' compliance during the trial to assess the safety and popularization of probiotic supplements, which can be regarded as a new potential therapeutic method for central nervous system diseases in the future. To fully assess for gaps in evidence, we will do the risk of bias assessment, and the strength of evidence for this conclusion will be determined by the items evaluated in the GRADE framework described above. We will highlight areas that need further study and give suggestions for future studies.

## **Registration and reporting of results**

We registered this study in PROSPERO international prospective register of systematic reviews on July 2019.<sup>28</sup> This protocol was drafted according to the Preferred Reporting Items for Systematic Reviews and Meta-Analyses Protocols (PRISMA).<sup>29</sup> The methods and results of the systematic review will be reported in accordance with the PRISMA guidelines.<sup>30</sup>

## **Patient and public involvement**

No patients or public will be involved in this systematic review protocol.

**Discussion**

With the increasing annual growth in industrial production of food containing probiotics worldwide, the interest in elucidating how changes in the gut microbiota and changes in brain activity as a result of probiotics ingestion can serve as a new way for treating subjects with central nervous system diseases is increasing. In our systematic review, we will synthesize the evidence evaluating the association between probiotic supplements and brain activity changes and gut microbiota changes in humans to decipher whether probiotics influence brain activity and whether the effect of probiotics on brain activity is associated with changes in gut microbiota. This review provides a new way of thinking about the treatment of central nervous system diseases and health maintenance. To our knowledge, this will be the first systematic review focused on this topic.

Additionally, from the adverse events and participants’ compliance with probiotic supplements, we can accumulate evidence for the popularization of probiotic therapy, which may be used to treat central system diseases in the future. This can help better understand probiotics’ clinical application, effectiveness, and safety.

Furthermore, we will determine gaps or uncertainties in the existing literature, which requires further study. However, given the potential implications of such an association, this review will provide a solid foundation for the design and implementation of future studies that can better clarify the relationship between probiotics and gut microbiota and brain activities in humans.

**Acknowledgements**

We thank Michal Bell, from Liwen Bianji, Edanz Editing China ( www. liwenbianji. cn/ ac) for editing the English text of a draft of this manuscript.

**Author’s Contributions**

LL developed the search strategy, TT and XL will search the databases and screen the eligibility of the retrieved studies. FL and XN will extract information from the

eligible studies and prepare the information for data analysis. JC,MS and SZ will perform the data analysis. LL and LZ wrote the first draft of the protocol. In practice, LZ will monitor each procedure of the review and is responsible for quality control. All authors read the article and approved it for publication. All authors read and approved the final manuscript and order of authorship.

## Funding

The review is supported by the National Key Research and Development Project(Grant No.2019YFC1709701),the National Natural Science Foundation of China (Grant No.81722050, 81973962) and the Interdisciplinary Program of Chengdu University of Traditional Chinese Medicine (Grant No.CZYJC1901). Funders and sponsors have no role in the design of this protocol.

## Competing interests

None declared

## References

1. Hill, C., F. Guarner, G. Reid, et al. "Expert consensus document.The International Scientific Association for Probiotics and Prebiotics consensus statement on the scope and appropriate use of the term probiotic." *Nat Rev Gastroenterol Hepatol* 11(8):506-514.
2. Hardy H, Harris J, Lyon E, et al. Probiotics, prebiotics and immunomodulation of gut mucosal defences: Homeostasis and immunopathology. *Nutrients* 2013;5:1869-912.
3. Toscano M,De Grandi, R.Miniello, V. L, et al. Ability of *Lactobacillus kefir* LKF01 (DSM32079) to colonize the intestinal environment and modify the gut microbiota composition of healthy individuals. *Dig Liver Dis.*2017;49(3):261-267.
4. Toscano M, De Grandi R, Stronati L, et al.Effect of *Lactobacillus rhamnosus* HN001 and *Bifidobacterium longum* BB536 on the healthy gut microbiota composition at phyla and species level:A preliminary study. *World J Gastroenterol* 2017;23(15):2696-2704.

- 1  
2  
3 5. Chen L, Xu W, Lee A, et al. The impact of *Helicobacter pylori* infection,  
4  
5 eradication therapy and probiotic supplementation on gut microenvironment  
6  
7 homeostasis: An open-label, randomized clinical trial. *EBioMedicine*. 2018  
8  
9 Sep;35:87-96.  
10  
11  
12
- 13 6. Mezzasalma V, Manfrini E, Ferri E, et al. A Randomized, Double-Blind,  
14  
15 Placebo-Controlled Trial: The Efficacy of Multispecies Probiotic Supplementation  
16  
17 in Alleviating Symptoms of Irritable Bowel Syndrome Associated with  
18  
19 Constipation. *Biomed Res Int*. 2016;2016:4740907.  
20  
21  
22
- 23 7. Claesson MJ, Jeffery IB, Conde S, et al. Gut microbiota composition correlates  
24  
25 with diet and health in the elderly. *Nature*. 2012 Aug 9;488(7410):178-84.  
26  
27
- 28 8. Mayer EA. Gut feelings: the emerging biology of gut-brain communication. *Nat*  
29  
30 *Rev Neurosci*. 2011 Jul 13;12(8):453-66.  
31  
32
- 33 9. Mukhtar K, Nawaz H, Abid S. Functional gastrointestinal disorders and gut-brain  
34  
35 axis: What does the future hold? *World J Gastroenterol*. 2019 Feb 7;25(5):552-566.  
36  
37
- 38 10. Strati F, Cavalieri D, Albanese D, et al. Altered gut microbiota in Rett syndrome.  
39  
40 *Microbiome*. 2016 Jul 30;4(1):41.  
41  
42
- 43 11. Severance EG, Gressitt KL, Stallings CR, et al. *Candida albicans* exposures, sex  
44  
45 specificity and cognitive deficits in schizophrenia and bipolar disorder. *NPJ*  
46  
47 *Schizophr*. 2016 May 4;2:16018.  
48  
49
- 50 12. Liu HN, Wu H, Chen YZ, et al. Altered molecular signature of intestinal  
51  
52 microbiota in irritable bowel syndrome patients compared with healthy controls: A  
53  
54 systematic review and meta-analysis. *Dig Liver Dis*. 2017 Apr;49(4):331-337.  
55  
56
- 57 13. Chong PP, Chin VK, Looi CY, et al. The Microbiome and Irritable Bowel  
58  
59 Syndrome - A Review on the Pathophysiology, Current Research and Future Therapy.  
60  
61 *Front Microbiol*. 2019 Jun 10;10:1136.
14. Messaoudi M, Lalonde R, Violle N, et al. Assessment of psychotropic-like

- properties of a probiotic formulation (*Lactobacillus helveticus* R0052 and *Bifidobacterium longum* R0175) in rats and human subjects. *Br J Nutr*. 2011 Mar;105(5):755-64.
15. Akkasheh G, Kashani-Poor Z, Tajabadi-Ebrahimi M, et al. Clinical and metabolic response to probiotic administration in patients with major depressive disorder: A randomized, double-blind, placebo-controlled trial. *Nutrition*. 2016 Mar;32(3):315-20.
16. Pinto-Sanchez MI, Hall GB, Ghajar K, et al. Probiotic *Bifidobacterium longum* NCC3001 Reduces Depression Scores and Alters Brain Activity: A Pilot Study in Patients With Irritable Bowel Syndrome. *Gastroenterology*. 2017 Aug;153(2):448-459.e8.
17. Wang H, Lee IS, Braun C, et al. Effect of Probiotics on Central Nervous System Functions in Animals and Humans: A Systematic Review. *J Neurogastroenterol Motil*. 2016 Oct 30;22(4):589-605.
18. Malan-Muller S, Valles-Colomer M, Raes J, et al. The Gut Microbiome and Mental Health: Implications for Anxiety- and Trauma-Related Disorders. *OMICS*. 2018 Feb;22(2):90-107.
19. Cong X, Henderson WA, Graf J, et al. Early Life Experience and Gut Microbiome: The Brain-Gut-Microbiota Signaling System. *Adv Neonatal Care*. 2015 Oct;15(5):314-23; quiz E1-2.
20. Tillisch K, Mayer EA, Labus JS. Quantitative meta-analysis identifies brain regions activated during rectal distension in irritable bowel syndrome. *Gastroenterology*. 2011 Jan;140(1):91-100.
21. Lener MS, Niciu MJ, Ballard ED, et al. Glutamate and Gamma-Aminobutyric Acid Systems in the Pathophysiology of Major Depression and Antidepressant Response to Ketamine. *Biol Psychiatry*. 2017 May 15;81(10):886-897.

22. Al Omran Y, Aziz Q. Functional brain imaging in gastroenterology: to new beginnings. *Nat Rev Gastroenterol Hepatol*. 2014 Sep;11(9):565-76.
23. Tillisch K, Labus J, Kilpatrick L, et al. Consumption of fermented milk product with probiotic modulates brain activity. *Gastroenterology*. 2013 Jun;144(7):1394-401, 1401.e1-4.
24. Agostini A, Filippini N, Cevolani D, et al. Brain functional changes in patients with ulcerative colitis: a functional magnetic resonance imaging study on emotional processing. *Inflamm Bowel Dis*. 2011 Aug;17(8):1769-77.
25. Bagga D, Reichert JL, Koschutnig K, et al. Probiotics drive gut microbiome triggering emotional brain signatures. *Gut Microbes*. 2018 Nov 2;9(6):486-496.
26. Higgins JP, Altman DG, Gøtzsche PC, et al. The Cochrane Collaboration's tool for assessing risk of bias in randomised trials. *BMJ*. 2011;343:d5928. Published 2011 Oct 18.
27. Guyatt GH, Oxman AD, Schünemann HJ, et al. GRADE guidelines: a new series of articles in the Journal of Clinical Epidemiology. *J Clin Epidemiol*. 2011;64(4):380-382.
28. Lu Liu, Xi Xiu NI, TIAN TIAN, et al. Effect of regulating gut microbiota using probiotics on brain activity: protocol of a systematic review. PROSPERO 2019 CRD42019145114. Available: [http://www.crd.york.ac.uk/PROSPERO/display\\_record.asp?ID=CRD42019145114](http://www.crd.york.ac.uk/PROSPERO/display_record.asp?ID=CRD42019145114)
29. Shamseer L, Moher D, Clarke M, et al. Preferred reporting items for systematic review and meta- analysis protocols (PRISMA- P) 2015: elaboration and explanation. *BMJ* 2015;350:g7647.
30. Moher D, Shamseer L, Clarke M, et al. Preferred reporting items for systematic review and meta-analysis protocols (PRISMA-P) 2015 statement. *Syst Rev*. 2015;4:1.

For peer review only

Table 1 Search terms and strategy

|                                             |                                                                                           |
|---------------------------------------------|-------------------------------------------------------------------------------------------|
| 1.probiotic                                 | 16.fermented milk                                                                         |
| 2.culturelle                                | 17.fMRI                                                                                   |
| 3.Bifidobacteria                            | 18.MRI                                                                                    |
| 4.Lactobailli                               | 19.MR                                                                                     |
| 5.Acidophilus                               | 20.functional magnetic resonance imaging                                                  |
| 6.yogurt                                    | 21.magnetic resonance imaging                                                             |
| 7.gut microbiota                            | 22.neuroimaging                                                                           |
| 8.yeast                                     | 23.brian activity                                                                         |
| 9.Saccharomyces                             | 24.MR tomography                                                                          |
| 10.prebiotic                                | 25.NMR Imaging                                                                            |
| 11.Synbiotics                               | 26.脑功能成像                                                                                  |
| 12.Bacillus                                 | 27.核磁共振成像                                                                                 |
| 13.enterococcus                             | 28.功能性磁共振                                                                                 |
| 14.streptococcus                            | 29.益生菌                                                                                    |
| 15.sour milk                                | 30.益生元                                                                                    |
|                                             | 31.肠道菌群                                                                                   |
| 32.“probiotic-related”terms                 | 1 OR 2 OR 3 OR 4 OR 5 OR 6 OR 7 OR 8 OR<br>9 OR 10 OR 11 OR 12 OR 13 OR 14 OR 15<br>OR 16 |
| 33.“fMRI-related”terms                      | 17 OR 18 OR 19 OR 20 OR 21 OR 22 OR 23<br>24 OR 25                                        |
| FINAL SEARCH TERMS                          | “32” AND “33”                                                                             |
| FINAL SEARCH TERMS FOR CHINESE<br>DATABASES | “29 OR 30 OR 31” AND “26 OR 27 OR 28”                                                     |

# BMJ Open

## Effect of regulating gut microbiota using probiotics on functional changes in the brain: protocol for a systematic review

|                                 |                                                                                                                                                                                                                                                                                                                                                                                                                                                                                                                                                                                                                                                                                                                                                                                                                                                                                                                                                                                                                                       |
|---------------------------------|---------------------------------------------------------------------------------------------------------------------------------------------------------------------------------------------------------------------------------------------------------------------------------------------------------------------------------------------------------------------------------------------------------------------------------------------------------------------------------------------------------------------------------------------------------------------------------------------------------------------------------------------------------------------------------------------------------------------------------------------------------------------------------------------------------------------------------------------------------------------------------------------------------------------------------------------------------------------------------------------------------------------------------------|
| Journal:                        | <i>BMJ Open</i>                                                                                                                                                                                                                                                                                                                                                                                                                                                                                                                                                                                                                                                                                                                                                                                                                                                                                                                                                                                                                       |
| Manuscript ID                   | bmjopen-2020-037582.R1                                                                                                                                                                                                                                                                                                                                                                                                                                                                                                                                                                                                                                                                                                                                                                                                                                                                                                                                                                                                                |
| Article Type:                   | Protocol                                                                                                                                                                                                                                                                                                                                                                                                                                                                                                                                                                                                                                                                                                                                                                                                                                                                                                                                                                                                                              |
| Date Submitted by the Author:   | 03-Apr-2020                                                                                                                                                                                                                                                                                                                                                                                                                                                                                                                                                                                                                                                                                                                                                                                                                                                                                                                                                                                                                           |
| Complete List of Authors:       | Liu, Lu; Chengdu University of Traditional Chinese Medicine, College of Acupuncture and Moxibustion and Tuina<br>Ni, Xixiu; Chengdu University of Traditional Chinese Medicine, College of Acupuncture and Moxibustion and Tuina<br>Tian, Tian; Chengdu University of Traditional Chinese Medicine, College of Acupuncture and Moxibustion and Tuina<br>Li, Xiao; Chengdu University of TCM, Acupuncture and Tuina School<br>Li, Fengmei; Chengdu University of Traditional Chinese Medicine, College of Acupuncture and Moxibustion and Tuina<br>Sun, Mingsheng; Chengdu University of Traditional Chinese Medicine, College of Acupuncture and Moxibustion and Tuina<br>Chen, Jiao; Chengdu University of Traditional Chinese Medicine, College of Acupuncture and Moxibustion and Tuina<br>Zhou, SiYuan; Chengdu University of Traditional Chinese Medicine, College of Acupuncture and Moxibustion and Tuina,<br>Zhao, Ling; Chengdu University of Traditional Chinese Medicine, College of Acupuncture and Moxibustion and Tuina |
| <b>Primary Subject Heading</b>: | Complementary medicine                                                                                                                                                                                                                                                                                                                                                                                                                                                                                                                                                                                                                                                                                                                                                                                                                                                                                                                                                                                                                |
| Secondary Subject Heading:      | Public health, Neurology, Mental health, Diagnostics                                                                                                                                                                                                                                                                                                                                                                                                                                                                                                                                                                                                                                                                                                                                                                                                                                                                                                                                                                                  |
| Keywords:                       | Microbiology < BASIC SCIENCES, Neurobiology < BASIC SCIENCES, Neuropathology < NEUROLOGY, Microbiology < PATHOLOGY, Magnetic resonance imaging < RADIOLOGY & IMAGING, Head & neck imaging < RADIOLOGY & IMAGING                                                                                                                                                                                                                                                                                                                                                                                                                                                                                                                                                                                                                                                                                                                                                                                                                       |
|                                 |                                                                                                                                                                                                                                                                                                                                                                                                                                                                                                                                                                                                                                                                                                                                                                                                                                                                                                                                                                                                                                       |

SCHOLARONE™  
Manuscripts

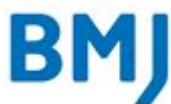

I, the Submitting Author has the right to grant and does grant on behalf of all authors of the Work (as defined in the below author licence), an exclusive licence and/or a non-exclusive licence for contributions from authors who are: i) UK Crown employees; ii) where BMJ has agreed a CC-BY licence shall apply, and/or iii) in accordance with the terms applicable for US Federal Government officers or employees acting as part of their official duties; on a worldwide, perpetual, irrevocable, royalty-free basis to BMJ Publishing Group Ltd ("BMJ") its licensees and where the relevant Journal is co-owned by BMJ to the co-owners of the Journal, to publish the Work in this journal and any other BMJ products and to exploit all rights, as set out in our [licence](#).

The Submitting Author accepts and understands that any supply made under these terms is made by BMJ to the Submitting Author unless you are acting as an employee on behalf of your employer or a postgraduate student of an affiliated institution which is paying any applicable article publishing charge ("APC") for Open Access articles. Where the Submitting Author wishes to make the Work available on an Open Access basis (and intends to pay the relevant APC), the terms of reuse of such Open Access shall be governed by a Creative Commons licence – details of these licences and which [Creative Commons](#) licence will apply to this Work are set out in our licence referred to above.

Other than as permitted in any relevant BMJ Author's Self Archiving Policies, I confirm this Work has not been accepted for publication elsewhere, is not being considered for publication elsewhere and does not duplicate material already published. I confirm all authors consent to publication of this Work and authorise the granting of this licence.

# Effect of regulating gut microbiota using probiotics on functional changes in the brain: protocol for a systematic review

Lu Liu,Xixiu Ni,Tian Tian,Xiao Li,Fengmei Li,Mingsheng Sun,Jiao Chen,Siyuan Zhou,Ling Zhao

Acupuncture and Tuina School, Chengdu University of TCM, Chengdu, 610075, Sichuan, China

## Authors:

Lu Liu, MD: Acupuncture and Tuina School, Chengdu University of Traditional Chinese Medicine, Chengdu, Sichuan 610075,China;liulu@stu.cdutcm.edu.cn

Xixiu Ni, MD: Acupuncture and Tuina School, Chengdu University of Traditional Chinese Medicine, Chengdu, Sichuan 610075,China;nixixiu@stu.cdutcm.edu.cn

Tian Tian, MD: Acupuncture and Tuina School, Chengdu University of Traditional Chinese Medicine, Chengdu, Sichuan 610075, China; tiantian@stu.cdutcm.edu.cn

Xiao Li, MD: Acupuncture and Tuina School, Chengdu University of Traditional Chinese Medicine, Chengdu, Sichuan 610075, China;1039061367@qq.com

Fengmei Li, MD: Acupuncture and Tuina School, Chengdu University of Traditional Chinese Medicine, Chengdu, Sichuan 610075, China;lifengmei@stu.cdutcm.edu.cn

Mingsheng Sun, PhD: Acupuncture and Tuina School, Chengdu University of

Traditional Chinese Medicine, Chengdu, Sichuan 610075, China; sunmingsheng@stu.  
cdutcm.edu.cn

Jiao Chen, PhD: Acupuncture and Tuina School, Chengdu University of Traditional  
Chinese Medicine, Chengdu, Sichuan 610075, China; chenjiao@cdutcm.edu.cn

Corresponding authors

Ling Zhao, PhD: Acupuncture and Tuina School, Chengdu University of Traditional  
Chinese Medicine, No.37 Shier Qiao Road, Chengdu, Sichuan 610075, China;  
Tel: +8602887687008; zhaoling@cdutcm.edu.cn;

Siyuan Zhou, PhD: Acupuncture and Tuina School, Chengdu University of  
Traditional Chinese Medicine, No.37 Shier Qiao Road, Chengdu, Sichuan 610075,  
China; Tel: +8602887687008; zsy@cdutcm.edu.cn

Word Count:

2,540 words

Key Words:

probiotics, gut microbiota, functional changes in the brain, fMRI, increased/decreased  
activity in brain regions, altered functional connectivity

## Abstract

**Introduction** There is a growing number of randomized controlled trials (RCTs) that focus on functional changes in the brain detected by functional magnetic resonance imaging (fMRI) and gut microbiota composition changes after using probiotics.

However, the effect of probiotics on functional changes in the brain through gut microbiota remains controversial in existing RCTs. Furthermore, to our knowledge, there is no systematic review to evaluate the effect of probiotics on functional changes in the brain through gut microbiota. Therefore, we aim to summarize literatures evaluating the potential association between probiotics, gut microbiota and functional changes in the brain to elucidate whether probiotics influence gut microbiota and

affect functional changes in the brain through gut microbiota.

**Methods and analysis** CNKI, Wanfang Data, VIP Databases, SinoMed, PubMed, Web of Science, MEDLINE, EMBASE, Scopus, the Cochrane Central Register of Controlled Trials, ClinicalTrials.gov and Cochrane Library CENTRAL will be searched until July 2019. The Grey Literature in Europe (OpenSIGLE) database and Google search engine will also be used. The reference lists of each included study will be reviewed to determine whether there are any further relevant studies. RCTs using probiotics compared with a placebo/control will be included. We will use risk of bias assessment and the GRADE System to assess the quality of evidence. The results of the systematic review will be synthesized narratively in the domains of the three primary outcome measures: 1) increased/decreased activity in brain regions or altered functional connectivity (FC) of brain detected by fMRI and their association with changes in behaviour, gastrointestinal/emotional symptoms after using probiotics; 2) changes in composition and diversity of the gut microbiota and their association with changes in behaviour, gastrointestinal/emotional symptoms after using probiotics; 3) increased/decreased activity in brain regions or altered FC of brain detected by fMRI and the changes in composition or diversity of the gut microbiota after probiotics' administration.

**Ethics and dissemination** The results will be disseminated through a peer-reviewed publication. As no private and confidential patient data will be included in the reporting, there are no ethical considerations associated with this protocol.

**PROSPERO registration number** CRD42019145114

## Article Summary

### Strengths and limitations of this study

1. This is the first systematic review assessing the potential association between probiotics, gut microbiota and functional changes in the brain.
2. The study design adheres to all relevant guidelines for systematic reviews and meta-analyses.

3. The quality of evidence will be assessed by the GRADE system.
4. This systematic review will have inherent limitations related to the included studies such as risk of bias, methodological inconsistencies and incomplete outcome data.
5. We will only retrieve data from Chinese and English databases, which may limit available data or result in language bias.

## Background

Probiotics are defined as “live microorganisms” that provide health benefits to the host when consumed in adequate amounts.<sup>1</sup> The use of probiotics has emerged as a principal approach to maintain the balance of the human gut microbiota.<sup>2</sup> Probiotics have a strong ability to modulate the gut microbiota composition in healthy subjects,<sup>3-4</sup> leading to a significant reduction in several bacterial genera directly involved in the onset of gastrointestinal diseases.<sup>3</sup> Furthermore, probiotics regulate the gut microbiota of patients with gastrointestinal diseases and improve clinical symptoms.<sup>5-6</sup> These findings show that probiotics can be used to treat gastrointestinal diseases by maintaining or changing the gut microbiota.

The gut microbiota includes bacteria, fungi, archaea, protozoa and viruses that interact with the host and each other to affect the host's physiology and health.<sup>7</sup> The microbiota has recently emerged as a key player in the gut-brain axis. This interaction between the brain and the microbiota in both animals and humans has led to the recognition of a new term called ‘microbiota-gut-brain axis’.<sup>8</sup> This interaction is bidirectional, meaning that disturbance in the complex community of microbiota (dysbiosis) can affect the brain and vice versa.<sup>9</sup> A meta-analysis that was performed on 13 studies up until 2016 has shown that there were significant differences in the levels of *Lactobacillus*, *Bifidobacterium* and *Faecalibacterium prausnitzii* in irritable bowel syndrome (IBS) patients compared with healthy controls.<sup>10</sup> Alteration in gut microbiota may contribute to pathogenesis of IBS patients by altering the gut-brain axis.<sup>11</sup> Patients with neurological disorders were linked to gastrointestinal dysfunction and changes in gut microbiota.<sup>12</sup> And in another clinical trial, *Candida albicans* exposure has been found to be associated with gastrointestinal dysfunction and impaired cognitive ability.<sup>13</sup> The underlying signaling mechanisms of these communicating networks between the gut flora and the gut-brain axis have been of

special interest to researchers who are seeking potential therapeutic interventions.<sup>9</sup>

The ingestion of probiotics by healthy humans showed diminished psychological symptoms, including anxiety symptoms,<sup>14</sup> while probiotic intervention significantly ameliorated the severity of depression in major depressive disorder patients,<sup>15</sup> and IBS patients.<sup>16</sup> The above results show that gut microbiota is related to various diseases, and that modulating gut microbiota through probiotics may offer a potential treatment option. However, most of the psychological assessments in clinical trials<sup>14,15,17</sup> were based solely on self-reported measures, hence firm conclusions regarding the effects of probiotics cannot be drawn from these findings.

Given the difficulty of studying the brain at the cellular level in humans, neuroimaging has emerged as a tool for increasing our understanding of the brain. Advances in computational biology are beginning to explain how these multifaceted and complex systems interact with each other.<sup>18-19</sup> Neuroimaging tools as outcome measures are more objective than self-reported measures, which is an advantage over self-reported measures. fMRI is able to measure moment-to-moment alterations in the blood oxygen content (the blood oxygen level dependent or BOLD signal).<sup>20</sup> Furthermore, it enables us to identify real-time changes in neurological activity and correlate these with changes in behavior or perception.<sup>21-23</sup> fMRI has been used successfully to identify differences in brain function in gastrointestinal disease states, such as IBS and inflammatory bowel disease, as well as in healthy people before and after chronic ingestion of probiotics.<sup>20,24-25</sup> fMRI is effective predominantly because of its non-invasiveness, and it can accurately and intuitively observe the location and range of brain functional activity from the whole level under physiological condition.<sup>26</sup> Using task based fMRI or resting-state fMRI (rsfMRI), enables us to examine whether probiotics influence the gut microbiota and affect activity in brain regions or FC of brain through the gut microbiota. It helps us better understand the microbiota-gut-brain axis, to potentially help develop therapeutic methods for central nervous system diseases in the future.

Recently, there were RCTs that focused on increased/decreased activity in brain regions<sup>24,27-28</sup> or altered FC of brain<sup>24,29</sup> detected by task based fMRI or rs-fMRI after using probiotics in healthy subjects. However, some studies have found changes in gut microbiota,<sup>27-28</sup> behaviour, gastrointestinal/emotional symptoms,<sup>27</sup> while others have

not.<sup>24</sup> Furthermore, to our knowledge, there is no systematic review to evaluate the effect of probiotics on functional changes in the brain through gut microbiota. Therefore, we plan to systematically analyze all published RCTs in the medical literature to assess the effects of probiotics on the gut microbiota and functional changes in the brain. This will improve our understanding of the microbiota-gut-brain axis. Moreover, a deeper understanding of the underlying mechanisms will help refine the clinical use of probiotic supplements in the future.

## Objectives

The objective of this systematic review is to summarize the literature evaluating the potential association between probiotics, gut microbiota and increased/decreased activity in brain regions or altered FC of brain in the healthy subjects after taking probiotics of any type, dosage, time point and duration will be evaluated. To this end, we aim to:

- (1) Evaluate the relationship between the changes in behaviour, gastrointestinal/emotional symptoms and increased/decreased activity in brain regions or altered FC of brain after probiotics' administration.
- (2) Evaluate the relationship between the behaviour, gastrointestinal/emotional symptoms and the changes in composition or diversity of gut microbiota after probiotics' administration.
- (3) Evaluate the relationship between increased/decreased activity in brain regions or altered FC of brain and the changes in composition or diversity of gut microbiota after probiotics' administration.

We aim to determine whether probiotics influence gut microbiota and affect functional changes in the brain through the gut microbiota.

## Methods

### Retrieval strategy

The following databases will be searched until July 2019 for relevant RCTs: China National Knowledge Infrastructure (CNKI), Wanfang Data, VIP Databases, SinoMed,

PubMed, Web of Science, MEDLINE, EMBASE, Scopus, the Cochrane Central Register of Controlled Trials, ClinicalTrials.gov and Cochrane Library CENTRAL. The Grey Literature in Europe (OpenSIGLE) database and Google search engine will also be searched. Furthermore, reference lists of each included study will be reviewed to determine whether there are any further relevant studies. The search terms will include probiotics (eg, “probiotics” or “culturelle” or “bifidobacteria” or “lactobacilli” or “escherichia coli” or “yogurt” or “yeast” or “saccharomyces” or “bacillus” or “enterococcus” or “streptococcus” or “fermented milk” or “sour milk” or “gastrointestinal microbiome” or “gut microbiota” or “gut microbiome” or “gut microflora” or “intestinal microflora” or “intestinal bacteria” or “intestinal microbiome” or “microbiome” or “microbiota” or “bacteria” or “flora”), fMRI (eg, “magnetic resonance imaging” or “fMRI” or “functional magnetic resonance imaging” or “neuroimaging” or “MRI” or “brain activity” or “MR tomography” or “NMR Imaging” or “MR” or “independent component analysis” or “functional network connectivity” or “amplitude of low frequency fluctuations” or “regional homogeneity” or “functional connectivity” or “central” or “brain” or “neuro” or “ALFF” or “FALFF” or “REHO” or “ROI” or “FC” or “ICA”). The following terms will be used in the Chinese database searches: “Yi sheng jun”, “Chang dao jun qun”, “Jun qun”, “Nao gong neng cheng xiang”, “Gong neng xing ci gong zhen”, “He ci gong zhen cheng xiang” and “He ci”. The search strategy for the PubMed database is shown in Table 1 (in the supplementary file), this strategy will be modified appropriately for other databases.

**Inclusion criteria**

- (1) Type of study: randomized clinical controlled trials.
- (2) Participants: healthy individuals
- (3) Interventions: probiotics compared with a placebo/control.
- (4) Outcomes measures: the primary outcome measures for this review will be the assessment of functional changes in the brain, which were measured by fMRI, as they relate to gut microbiota regulated by probiotics. Three different primary outcome measures will be obtained from the following primary research: 1) increased/decreased activity in brain regions or altered FC of brain detected by fMRI and their association

with changes in behaviour,gastrointestinal/emotional symptoms after using probiotics;

2) changes in composition and diversity of the gut microbiota and their association with changes in behaviour,gastrointestinal/emotional symptoms after using probiotics;

3) increased/decreased activity in brain regions or altered FC of brain detected by fMRI and the changes in composition or diversity of the gut microbiota after probiotics' administration.Secondary outcomes: adverse events and participants' compliance during the trial.

### **Exclusion criteria**

(1) Non-randomized clinical controlled trials.

(2) Editorials, literature reviews, and meta-analyses.

(3) Duplicate publications.

(4) Studies without full report of study results or primary data.

### **Study selection**

All the studies retrieved through the search strategy will first be screened based on title and abstract using ENDNOTE, which can remove duplicates. Two reviewers will independently screen all titles and abstracts according to the inclusion criteria. Any disagreements will be resolved by discussion or a third reviewer. Full text of potentially eligible studies based on title and abstract will be screened for eligibility by two reviewers independently; disagreements will be resolved by discussion or a third reviewer if necessary. Reasons for study exclusions will be recorded.

### **Data extraction**

Data will be extracted from each eligible study including the following information: authors; year of publication; journal; sample size; demographic characteristics of sample (age, ethnicity, sex); any information (e.g. type, duration, dose, time point) we can get on the intervention group and control/placebo group; data analysis strategy used;fMRI data analysis strategy used; outcomes,and conclusions.

### **Quality assessment**

Risk of bias assessment: the included studies will be assessed by two independent investigators using the Cochrane Risk of Bias Assessment Tool.<sup>30</sup> The assessment will include contents of random sequence generation, allocation concealment, blinding (of participants, personnel and outcome assessors), incomplete outcome data and selective outcome reporting and other sources of bias. The investigators' judgment will be categorized as "Low risk", "High risk" or "Unclear risk" of bias. The disagreements will be resolved by discussion or a third analyzer if necessary.

Quality of evidence assessment: two independent reviewers will assess overall quality of evidence using the Grading of Recommendations Assessment, Development and Evaluation (GRADE) system, examining the quality of the literature in five domains—risk of bias, publication bias, consistency, directness, and precision.<sup>31</sup> This system has four levels of classification ("high", "moderate", "low" and "very low") to which each study can be assigned based on different factors. Disagreements will be resolved by discussion or a third analyzer if necessary.

**Strategy of data synthesis**

The results of the systematic review will be synthesized narratively in the domains of the three primary outcome measures: 1) increased/decreased activity in brain regions or altered FC of brain and their association with changes in behaviour, gastrointestinal/emotional symptoms after using probiotics; 2) changes in composition and diversity of the gut microbiota and their association with changes in behaviour, gastrointestinal/emotional symptoms after using probiotics; 3) increased/decreased activity in brain regions or altered FC of brain and the changes in composition or diversity of the gut microbiota after probiotics' administration. and one secondary outcome measure: the relevant adverse events and participants' compliance. We will extract the increased/decreased activity in brain regions or altered FC of brain to evaluate whether probiotics are effective in activating/deactivating particular brain regions or are effective in altering FC of brain, where the functional changes in the brain are. Additionally, we will evaluate the relationship between the changes in behaviour, gastrointestinal/emotional symptoms and the increased/decreased activity in brain

regions or altered FC of brain after probiotics' administration. If possible from the number of studies available, we will use narrative review to explicate whether a "dose-dependent" or "type-dependent" relationship can be identified between probiotic supplements and functional changes in the brain. We will also evaluate the relationship between the changes in behaviour, gastrointestinal/emotional symptoms and the changes in composition or diversity of the gut microbiota after probiotics' administration, and evaluate the relationship between the increased/decreased activity in brain regions or altered FC of brain and the changes in composition or diversity of the gut microbiota after probiotics' administration. Finally, we will record all the adverse events and participants' compliance during the trial to assess the safety and popularization of probiotic supplements, which can be regarded as a new potential therapeutic method for central nervous system diseases in the future. To fully assess for gaps in evidence, we will do the risk of bias assessment, and the strength of evidence for this conclusion will be determined by the items evaluated in the GRADE framework described above. We will highlight areas that need further study and give suggestions for future studies.

### **Registration and reporting of results**

We registered this study in PROSPERO international prospective register of systematic reviews on July 2019.<sup>32</sup> This protocol was drafted according to the Preferred Reporting Items for Systematic Reviews and Meta-Analyses Protocols (PRISMA).<sup>33</sup> The methods and results of the systematic review will be reported in accordance with the PRISMA guidelines.<sup>34</sup>

### **Patient and public involvement**

No patients or public will be involved in this systematic review protocol.

### **Discussion**

According to the Global Burden of Disease Study, 322 and 264 million people worldwide suffered from depression and anxiety, respectively in 2015. This is an increase of 18.4% and 14.9% over the 2005 figures.<sup>35</sup> There were more than 80 million stroke survivors in the world,<sup>36</sup> 43.8 million people with dementia,<sup>37</sup> 45.9 million patients with an active epilepsy,<sup>38</sup> and 6.1 million individuals with Parkinson's

disease.<sup>39</sup> Globally, in 2016, neurological disorders were the leading cause of disability (276 million disability-adjusted life-years) and the second leading cause of deaths (9 million) in the world.<sup>40</sup> With the increasing annual growth in industrial production of food containing probiotics worldwide, the interest in elucidating how changes in the gut microbiota and functional changes in brain as a result of probiotics ingestion can serve as a new way for treating subjects with central nervous system diseases is increasing. In our systematic review, we will synthesize the evidence evaluating the association between probiotic supplements and functional changes in the brain and gut microbiota changes in humans to decipher whether probiotics influence functional changes in the brain and whether the effect of probiotics on functional changes in the brain is associated with changes in gut microbiota. This review provides a new way of thinking about the treatment of central nervous system diseases and health maintenance. To our knowledge, this will be the first systematic review focused on this topic.

Additionally, from the adverse events and participants' compliance with probiotic supplements, we can accumulate evidence for the popularization of probiotic therapy, which may be used to treat central system diseases in the future. This can help better understand probiotics' clinical application, effectiveness, and safety.

Furthermore, we will determine gaps or uncertainties in the existing literature, which requires further study. However, given the potential implications of such an association, this review will provide a solid foundation for the design and implementation of future studies that can better clarify the relationship between probiotics and functional changes in the brain and gut microbiota and in humans.

**Acknowledgements**

We thank Michal Bell, from Liwen Bianji, Edanz Editing China ( [www.liwenbianji.cn/](http://www.liwenbianji.cn/) ac) for editing the English text of a draft of this manuscript.

**Author's Contributions**

LL developed the search strategy, TT and XL will search the databases and screen the eligibility of the retrieved studies. FL and XN will extract information from the eligible studies and prepare the information for data analysis. JC, MS and SZ will

perform the data analysis. LL and LZ wrote the first draft of the protocol. In practice, LZ will monitor each procedure of the review and is responsible for quality control. All authors read the article and approved it for publication. All authors read and approved the final manuscript and order of authorship.

## Funding

The review is supported by the National Key Research and Development Project(Grant No.2019YFC1709701),the National Natural Science Foundation of China (Grant No.81722050, 81973962) and the Interdisciplinary Program of Chengdu University of Traditional Chinese Medicine (Grant No.CZYJC1901). Funders and sponsors have no role in the design of this protocol.

## Competing interests

None declared

## References

1. Hill, C., F. Guarner, G. Reid, et al. "Expert consensus document.The International Scientific Association for Probiotics and Prebiotics consensus statement on the scope and appropriate use of the term probiotic." *Nat Rev Gastroenterol Hepatol* 11(8):506-514.
2. Hardy H, Harris J, Lyon E, et al. Probiotics, prebiotics and immunomodulation of gut mucosal defences: Homeostasis and immunopathology. *Nutrients* 2013;5:1869-912.
3. Toscano M,De Grandi, R.Miniello, V. L, et al. Ability of *Lactobacillus kefir* LKF01 (DSM32079) to colonize the intestinal environment and modify the gut microbiota composition of healthy individuals. *Dig Liver Dis.*2017;49(3):261-267.
4. Toscano M, De Grandi R, Stronati L, et al.Effect of *Lactobacillus rhamnosus* HN001 and *Bifidobacterium longum* BB536 on the healthy gut microbiota composition at phyla and species level:A preliminary study. *World J Gastroenterol* 2017;23(15):2696-2704.
5. Chen L, Xu W, Lee A, et al. The impact of *Helicobacter pylori* infection,

- eradication therapy and probiotic supplementation on gut microenvironment homeostasis: An open-label, randomized clinical trial. *EBioMedicine*. 2018 Sep;35:87-96.
6. Mezzasalma V, Manfrini E, Ferri E, et al. A Randomized, Double-Blind, Placebo-Controlled Trial: The Efficacy of Multispecies Probiotic Supplementation in Alleviating Symptoms of Irritable Bowel Syndrome Associated with Constipation. *Biomed Res Int*. 2016;2016:4740907.
7. Claesson MJ, Jeffery IB, Conde S, et al. Gut microbiota composition correlates with diet and health in the elderly. *Nature*. 2012 Aug 9;488(7410):178-84.
8. Mayer EA. Gut feelings: the emerging biology of gut-brain communication. *Nat Rev Neurosci*. 2011 Jul 13;12(8):453-66.
9. Mukhtar K, Nawaz H, Abid S. Functional gastrointestinal disorders and gut-brain axis: What does the future hold? *World J Gastroenterol*. 2019 Feb 7;25(5):552-566.
10. Liu HN, Wu H, Chen YZ, et al. Altered molecular signature of intestinal microbiota in irritable bowel syndrome patients compared with healthy controls: A systematic review and meta-analysis. *Dig Liver Dis*. 2017 Apr;49(4):331-337.
11. Chong PP, Chin VK, Looi CY, et al. The Microbiome and Irritable Bowel Syndrome-A Review on the Pathophysiology, Current Research and Future Therapy. *Front Microbiol*. 2019 Jun 10;10:1136.
12. Strati F, Cavalieri D, Albanese D, et al. Altered gut microbiota in Rett syndrome. *Microbiome*. 2016 Jul 30;4(1):41.
13. Severance EG, Gressitt KL, Stallings CR, et al. *Candida albicans* exposures, sex specificity and cognitive deficits in schizophrenia and bipolar disorder. *NPJ Schizophr*. 2016 May 4;2:16018.
14. Messaoudi M, Lalonde R, Violle N, et al. Assessment of psychotropic-like properties of a probiotic formulation (*Lactobacillus helveticus* R0052 and

- 1  
2  
3 Bifidobacterium longum R0175) in rats and human subjects. Br J Nutr. 2011  
4  
5  
6 Mar;105(5):755-64.  
7  
8  
9 15. Akkasheh G, Kashani-Poor Z, Tajabadi-Ebrahimi M, et al. Clinical and metabolic  
10  
11 response to probiotic administration in patients with major depressive disorder:  
12  
13 A randomized, double-blind, placebo-controlled trial. Nutrition. 2016 Mar;32(3):315-  
14  
15 20.  
16  
17 16. Pinto-Sanchez MI, Hall GB, Ghajar K, et al. Probiotic Bifidobacterium longum  
18  
19 NCC3001 Reduces Depression Scores and Alters Brain Activity: A Pilot Study in  
20  
21 Patients With Irritable Bowel Syndrome. Gastroenterology. 2017 Aug;153(2):448-  
22  
23 459.e8.  
24  
25 17. Ostadmohammadi V, Jamilian M, Bahmani F, et al. Vitamin D and probiotic  
26  
27 co-supplementation affects mental health, hormonal, inflammatory and oxidative  
28  
29 stress parameters in women with polycystic ovary syndrome. J Ovarian Res. 2019  
30  
31 Jan 21;12(1):5.  
32  
33  
34  
35 18. Malan-Muller S, Valles-Colomer M, Raes J, et al. The Gut Microbiome and  
36  
37 Mental Health: Implications for Anxiety- and Trauma-Related Disorders. OMICS.  
38  
39 2018 Feb;22(2):90-107.  
40  
41  
42 19. Cong X, Henderson WA, Graf J, et al. Early Life Experience and Gut  
43  
44 Microbiome: The Brain-Gut-Microbiota Signaling System. Adv Neonatal Care. 2015  
45  
46 Oct;15(5):314-23; quiz E1-2.  
47  
48  
49 20. Tillisch K, Mayer EA, Labus JS. Quantitative meta-analysis identifies brain  
50  
51 regions activated during rectal distension in irritable bowel syndrome.  
52  
53 Gastroenterology. 2011 Jan;140(1):91-100.  
54  
55  
56 21. Wang H, Lee IS, Braun C, et al. Effect of Probiotics on Central Nervous  
57  
58 System Functions in Animals and Humans: A Systematic Review. J  
59  
60

- Neurogastroenterol Motil. 2016 Oct 30;22(4):589-605.
22. Lener MS, Niciu MJ, Ballard ED, et al. Glutamate and Gamma-Aminobutyric Acid Systems in the Pathophysiology of Major Depression and Antidepressant Response to Ketamine. *Biol Psychiatry*. 2017 May 15;81(10):886-897.
23. Al Omran Y, Aziz Q. Functional brain imaging in gastroenterology: to new beginnings. *Nat Rev Gastroenterol Hepatol*. 2014 Sep;11(9):565-76.
24. Tillisch K, Labus J, Kilpatrick L, et al. Consumption of fermented milk product with probiotic modulates brain activity. *Gastroenterology*. 2013 Jun;144(7):1394-401, 1401.e1-4.
25. Agostini A, Filippini N, Cevolani D, et al. Brain functional changes in patients with ulcerative colitis: a functional magnetic resonance imaging study on emotional processing. *Inflamm Bowel Dis*. 2011 Aug;17(8):1769-77.
26. Smitha KA, Akhil Raja K, Arun KM, et al. Resting state fMRI: A review on methods in resting state connectivity analysis and resting state networks. *Neuroradiol J*. 2017 Aug;30(4):305-317.
27. Bagga D, Reichert JL, Koschutnig K, et al. Probiotics drive gut microbiome triggering emotional brain signatures. *Gut Microbes*. 2018 Nov 2;9(6):486-496.
28. Tillisch K, Mayer EA, Gupta A, et al. Brain Structure and Response to Emotional Stimuli as Related to Gut Microbial Profiles in Healthy Women. *Psychosom Med*. 2017 Oct;79(8):905-913.
29. Bagga D, Aigner CS, Reichert JL, et al. Influence of 4-week multi-strain probiotic administration on resting-state functional connectivity in healthy volunteers. *Eur J Nutr*. 2019 Aug;58(5):1821-1827.
30. Higgins JP, Altman DG, Gøtzsche PC, et al. The Cochrane Collaboration's tool for assessing risk of bias in randomised trials. *BMJ*. 2011;343:d5928. Published 2011 Oct 18.
31. Guyatt GH, Oxman AD, Schünemann HJ, et al. GRADE guidelines: a new series of articles in the Journal of Clinical Epidemiology. *J Clin Epidemiol*. 2011;64(4):380–

382.

32. Lu Liu, Xi Xiu NI, TIAN TIAN, et al. Effect of regulating gut microbiota using probiotics on brain activity: protocol of a systematic review. PROSPERO 2019 CRD42019145114. Available: [http://www.crd.york.ac.uk/PROSPERO/display\\_record.](http://www.crd.york.ac.uk/PROSPERO/display_record.asp?ID=CRD42019145114)

asp?ID=CRD42019145114

33. Shamseer L, Moher D, Clarke M, et al. Preferred reporting items for systematic review and meta-analysis protocols (PRISMA- P) 2015: elaboration and explanation. BMJ 2015;350:g7647.

34. Moher D, Shamseer L, Clarke M, et al. Preferred reporting items for systematic review and meta-analysis protocols (PRISMA-P) 2015 statement. Syst Rev. 2015;4:1.

35. Vos, T., Allen, C., Arora, M., et al. (2016). Global, regional, and national incidence, prevalence, and years lived with disability for 310 diseases and injuries, 1990–2015: a systematic analysis for the Global Burden of Disease Study 2015. The Lancet, 388

(10053), 1545–1602.

36. GBD 2016 Stroke Collaborators. Global, regional, and national burden of stroke, 1990–2016: a systematic analysis for the Global Burden of Disease Study 2016.

Lancet Neurol 2019;18:439–58.

37. GBD 2016 Dementia Collaborators. Global, regional, and national burden of Alzheimer's disease and other dementias, 1990–2016: a systematic analysis for the Global Burden of Disease Study 2016. Lancet Neurol 2019;18:88–106.

38. GBD 2016 Epilepsy Collaborators. Global, regional, and national burden of epilepsy, 1990–2016: a systematic analysis for the Global Burden of Disease Study 2016. Lancet Neurol 2019;18:357–75.

39. GBD 2016 Parkinson's Disease Collaborators. Global, regional, and national burden of Parkinson's disease, 1990–2016: a systematic analysis for the Global Burden of Disease Study 2016. Lancet Neurol 2018;17:939–53.

40. GBD 2016 Neurology Collaborators. Global, regional, and national burden of

1  
2  
3  
4  
5  
6  
7  
8  
9  
10  
11  
12  
13  
14  
15  
16  
17  
18  
19  
20  
21  
22  
23  
24  
25  
26  
27  
28  
29  
30  
31  
32  
33  
34  
35  
36  
37  
38  
39  
40  
41  
42  
43  
44  
45  
46  
47  
48  
49  
50  
51  
52  
53  
54  
55  
56  
57  
58  
59  
60

neurological disorders, 1990–2016: a systematic analysis for the Global Burden of  
Disease Study 2016. *Lancet Neurol* 2019;18:459–80.

For peer review only

Search strategy for the Pubmed database is as follows, and filters in article types, publication dates and species, we chose clinical trials, 10 years and humans respectively.

Table 1 Search strategy for the Pubmed database

|                                       |                                                    |
|---------------------------------------|----------------------------------------------------|
| 1.probiotics. Mesh.                   | 27.magnetic resonance imaging. Mesh.               |
| 2.culturelle. ti, ab                  | 28.fMRI. ti, ab                                    |
| 3.bifidobacteria. ti, ab              | 29.MRI. ti, ab                                     |
| 4.lactobacilli. ti, ab                | 30.MR. ti, ab                                      |
| 5.escherichia coli. ti, ab            | 31.functional magnetic resonance imaging. ti, ab   |
| 6.yogurt. ti, ab                      | 32.NMR Imaging. ti, ab                             |
| 7.yeast. ti, ab                       | 33.neuroimaging. ti, ab                            |
| 8.saccharomyces. ti, ab               | 34.brain activity. ti, ab                          |
| 9.bacillus. ti, ab                    | 35.MR tomography. ti, ab                           |
| 10.enterococcus. ti, ab               | 36.independent component analysis. ti, ab          |
| 11.streptococcus. ti, ab              | 37. functional network connectivity. ti, ab        |
| 12.fermented milk. ti, ab             | 38.amplitude of low frequency fluctuations. ti, ab |
| 13.sour milk. ti, ab                  | 39.regional homogeneity. ti, ab                    |
| 14. 1 or 2-13                         | 40.functional connectivity. ti, ab                 |
| 15.gastrointestinal microbiome. Mesh. | 41.central. ti, ab                                 |
| 16.gut microbiota. ti, ab             | 42.brain. ti, ab                                   |
| 17.gut microbiome. ti, ab             | 43.neuro. ti, ab                                   |
| 18.gut microflora. ti, ab             | 44.ALFF. ti, ab                                    |
| 19.intestinal microflora. ti, ab      | 45.FALFF. ti, ab                                   |
| 20.intestinal bacteria. ti, ab        | 46.ReHo. ti, ab                                    |
| 21.intestinal microbiome. ti, ab      | 47.ROI. ti, ab                                     |
| 22.microbiome. ti, ab                 | 48.ICA. ti, ab                                     |
| 23.microbiota. ti, ab                 | 49.FC. ti, ab                                      |
| 24.flora. ti, ab                      | 50. 27 or 28-49                                    |
| 25.bacteria. ti, ab                   | 51. 14 or 26                                       |
| 26. 15 or 16-25                       | 52.(Final search) 50 and 51                        |
